# Supplementary material
Source: PubMed Central journal article supplement (PMC8196253)
Supplement: tavakol_2020_supplementary_bhab001.pdf [file tavakol_2020_supplementary_bhab001.pdf]

# A STRUCTURE-FUNCTION SUBSTRATE OF MEMORY FOR SPATIAL CONFIGURATIONS IN MEDIAL AND LATERAL TEMPORAL CORTICES

Shahin Tavakol<sup>1</sup>, Qionglng Li<sup>1</sup>, Jessica Royer<sup>1</sup>, Reinder Vos de Wael<sup>1</sup>, Sara Larivière<sup>1</sup>, Alex Lowe<sup>1</sup>, Casey Paquola<sup>1</sup>, Elizabeth Jefferies<sup>2</sup>, Tom Hartley<sup>2</sup>, Andrea Bernasconi<sup>1</sup>, Neda Bernasconi<sup>1</sup>, Jonathan Smallwood<sup>2</sup>, Veronique Bohbot<sup>3</sup>, Lorenzo Caciagli<sup>4\*</sup>, Boris Bernhardt<sup>1\*</sup>

- 1) *McConnell Brain Imaging Centre, Montreal Neurological Institute and Hospital, McGill University, Montreal, Quebec, Canada*
- 2) *University of York, York, UK*
- 3) *Douglas Mental Health University Institute, McGill University, Montreal, Quebec, Canada*
- 4) *Department of Bioengineering, University of Pennsylvania, Philadelphia, USA*

## SUPPLEMENTARY METHODS

### *Structural MRI processing*

*Hippocampal subfield surface mapping.* We harnessed a validated approach for the segmentation of hippocampal subfields, generation of surfaces running through the core of each subfield, and surface-based “unfolding” of hippocampal features (Caldairou, et al., 2016; Bernhardt, et al., 2016; Vos de Wael, et al., 2018). In brief, each participant’s native-space T1w image underwent automated correction for intensity non-uniformity, intensity standardization, and linear registration to the MNI152 template. Images were subsequently processed using a multi-template surface-patch algorithm (Caldairou, et al., 2016), which automatically segments the left and right hippocampal formation into subiculum, CA1-3, and CA4-DG. An open-access database of manual subfield segmentations and corresponding high resolution 3T MRI data (Kulaga-Yoskovitz, et al., 2015) was used for algorithm training. A Hamilton-Jacobi approach (Kim, et al., 2014) generated a medial surface sheet representation running along the central path of each subfield and surfaces were parameterized using a spherical harmonics framework with a point distribution model (Styner, et al., 2006). For each subfield surface vertex, we then calculated columnar volume as a marker of local grey matter (Kim, et al., 2014). During data analysis, vertex-wise projections of hippocampal columnar volume underwent surface-wide smoothing (FWHM=10) using SurfStat for Matlab (MathWorks, R2019b).

## SUPPLEMENTARY FIGURES

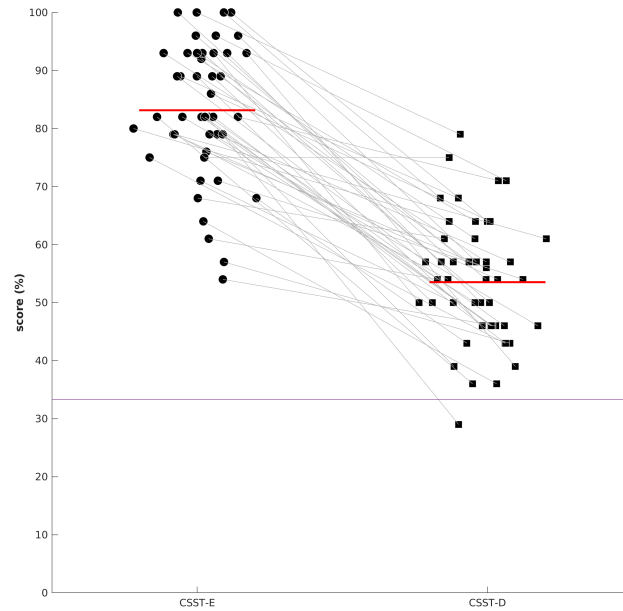

**Supplemental Figure 1** | Participants scored significantly higher on the CSST-E ( $83.1 \pm 11.3\%$ ) compared to the CSST-D ( $53.5 \pm 10.7$ ) as evidenced by a two-tailed paired student t-test ( $t=16.8$ ,  $p<0.001$ ). Red horizontal lines show distribution means. Chance level performance is depicted as a horizontal line (33.33%). Participants scored significantly higher than chance level on each condition (CSST-E:  $t=30.4$ ,  $p<0.001$ ; CSST-D:  $t=13.1$ ,  $p<0.001$ ).

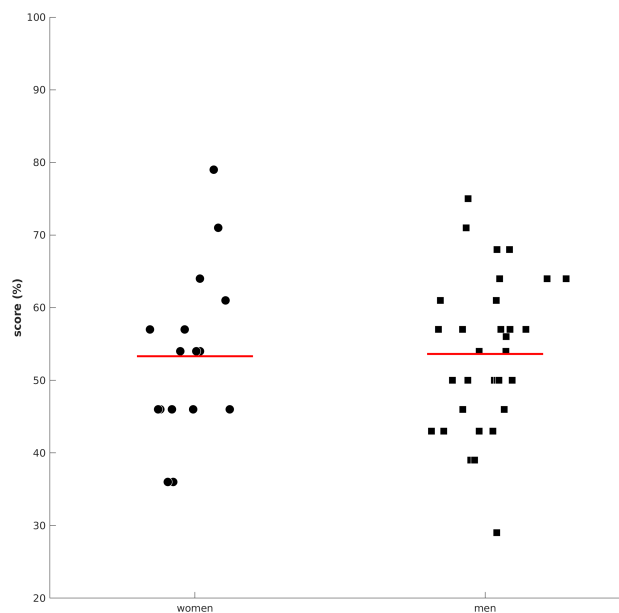

**Supplemental Figure 2** | In order to assess whether variability in the results is driven by middle-aged participants, we assessed whether individuals above 35 years of age performed similarly to younger adults. No age-related differences were observed in either sex group (older women:  $54.5 \pm 14.4\%$ , young women:  $52.9 \pm 11.3\%$ ,  $t=0.227$ ,  $p=0.823$ ; older men:  $50.4 \pm 7.5\%$ , young men:  $54.5 \pm 11.0\%$ ,  $t=0.918$ ,  $p=0.366$ ). Thus, we combined data across age strata in each group and compared scores. We observed no sex differences in CSST-D performance (women:  $53.3 \pm 11.7\%$ ; men:  $53.6 \pm 10.4\%$ ;  $t=0.094$ ,  $p=0.925$ ).

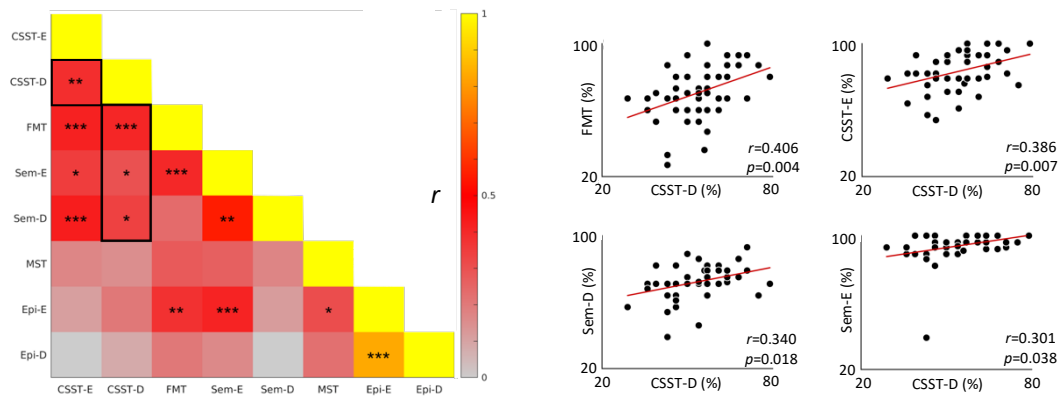

**Supplemental Figure 3** | *left*: correlation matrix of performance across all tasks, including easy conditions. Outlined area shows tasks with which CSST-D shows significant associations ( $*p<0.05$ ;  $**p<0.01$ ;  $***p<0.005$ ). *right*: scatter plot of most significant associations with other tasks (FMT: Four Mountains Task; CSST-D/E: Conformational Shift Spatial Task-Difficult/Easy; Sem-D/E: Semantic Task-Difficult/Easy; Epi-D/E: Episodic Difficult/Easy; MST: Mnemonic Similarity/Discrimination Task)

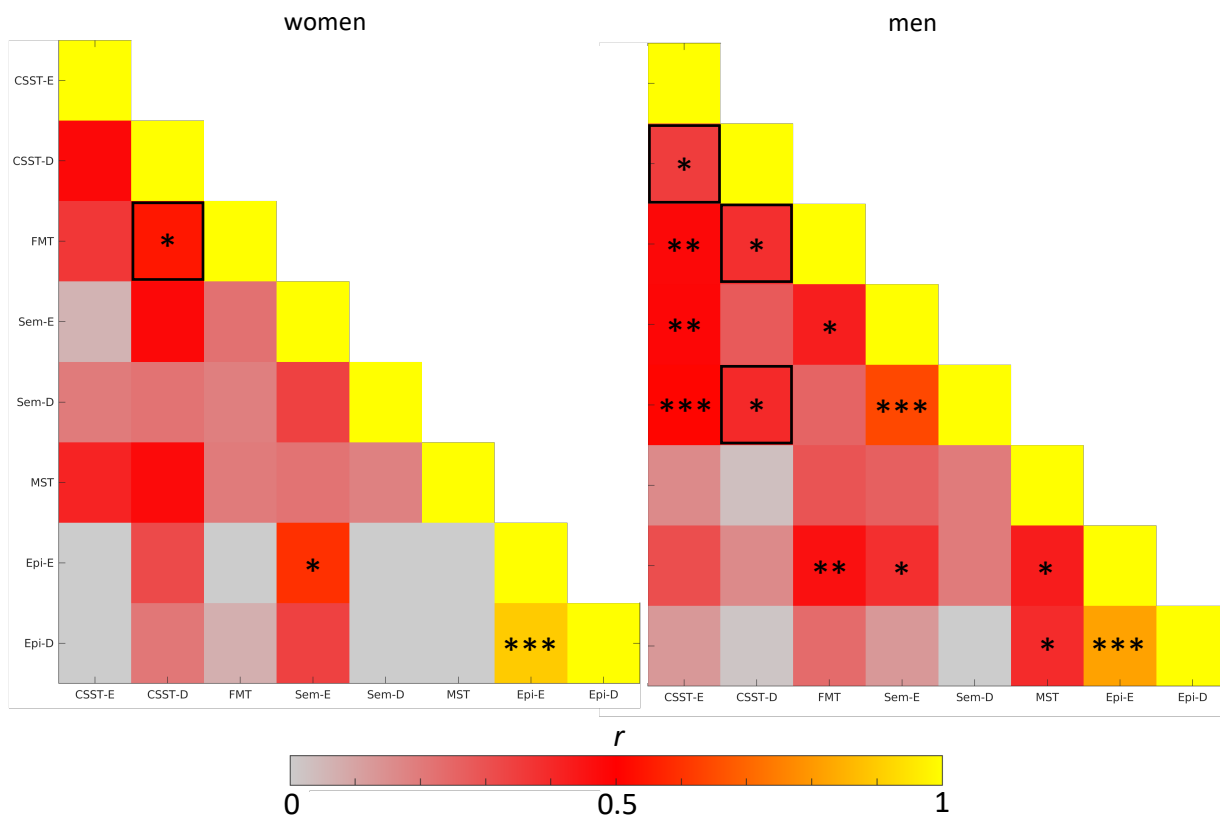

**Supplemental Figure 4** | Correlation matrix of performance across all tasks for women and men. Outlined areas show tasks with which CSST-D shows significant associations ( $*p<0.05$ ;  $**p<0.01$ ;  $***p<0.005$ ). (FMT: Four Mountains Task; CSST-D/E: Conformational Shift Spatial Task-Difficult/Easy; Sem-D/E: Semantic Task-Difficult/Easy; Epi-D/E: Episodic Difficult/Easy; MST: Mnemonic Similarity/Discrimination Task)

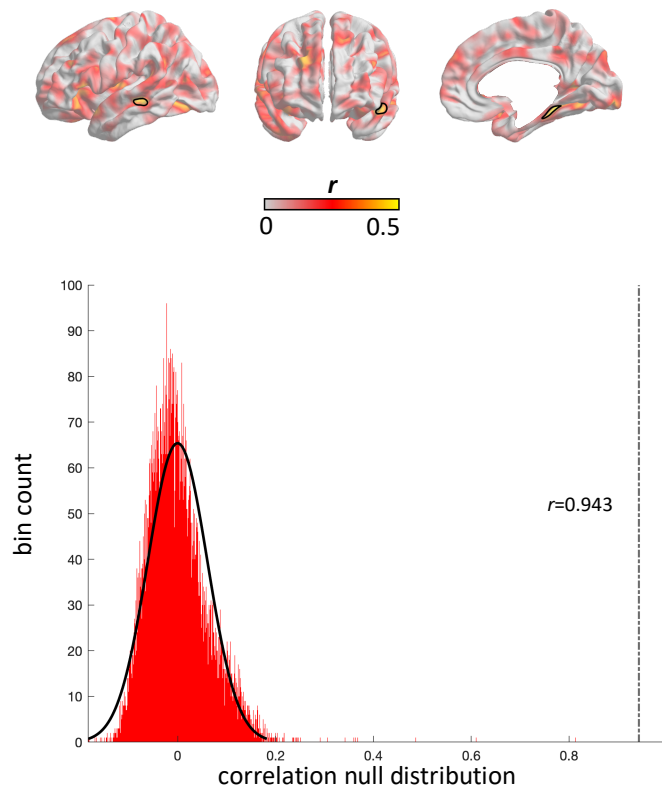

**Supplemental Figure 5 | top panel:** Product-moment correlation coefficients of CSST-D performance on cortical thickness after regressing out age and sex for right-handed participants ( $n=44$ ). Highlighted clusters denote regions of significant association after multiple comparisons correction ( $p_{FWE}<0.05$ ). **bottom panel:** a non-parametric null distribution was generated by correlating the *CSST-D x cortical thickness* statistical  $t$  map with 10,000 permuted  $t$  maps of *right-handed only CSST-D x cortical thickness*. Actual correlation between original maps is shown by the dashdotted line ( $r=0.943$ , non-parametric  $p<0.001$ ).



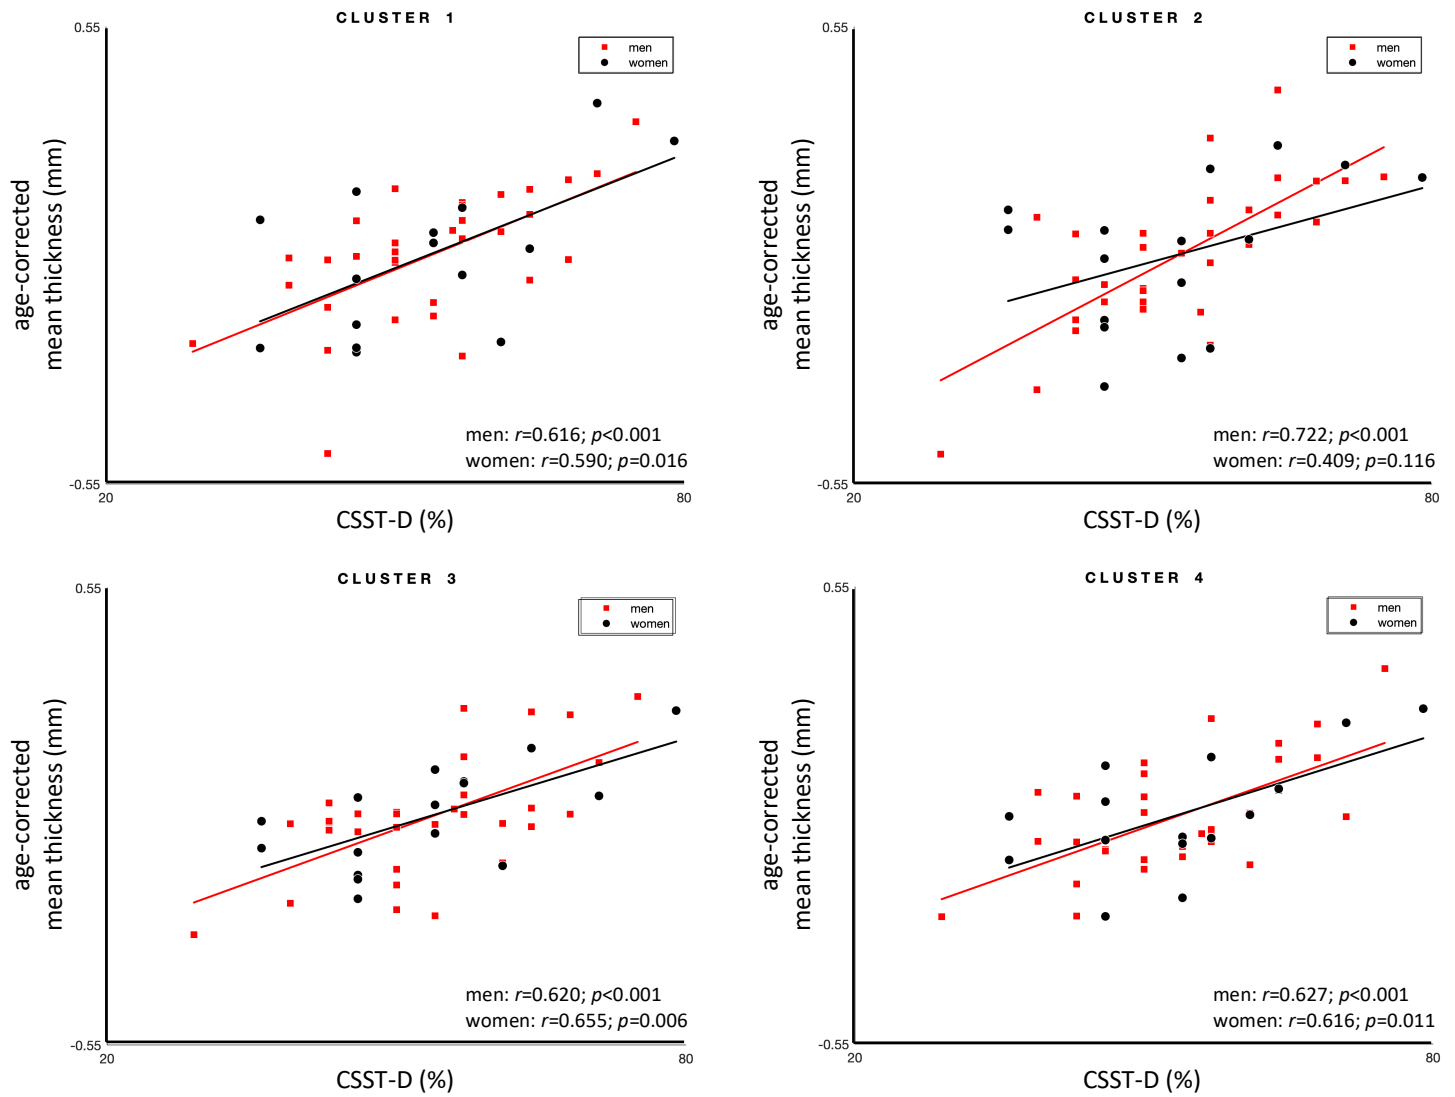

**Supplemental Figure 6** | Controlling for age, we observed moderate-to-high associations between average cortical thickness and CSST-D scores for all clusters in men and women.

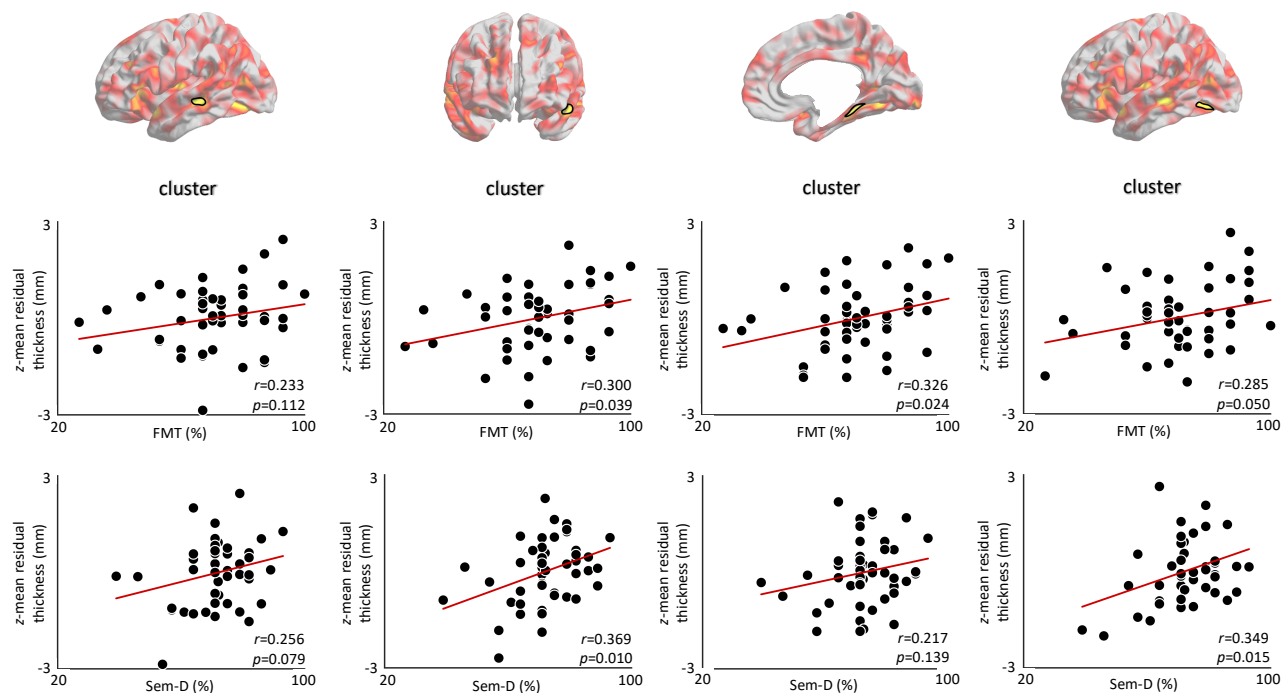

**Supplemental Figure 7** | Cluster-wise associations between cortical thickness and scores for FMT (top row scatterplots) and Sem-D (bottom row scatterplots). Correlation coefficients ranged between  $r=0.233$ - $0.326$  for FMT (mean effect of 0.353), and between  $r=0.217$ - $0.369$  for Sem-D (mean effect of 0.373).

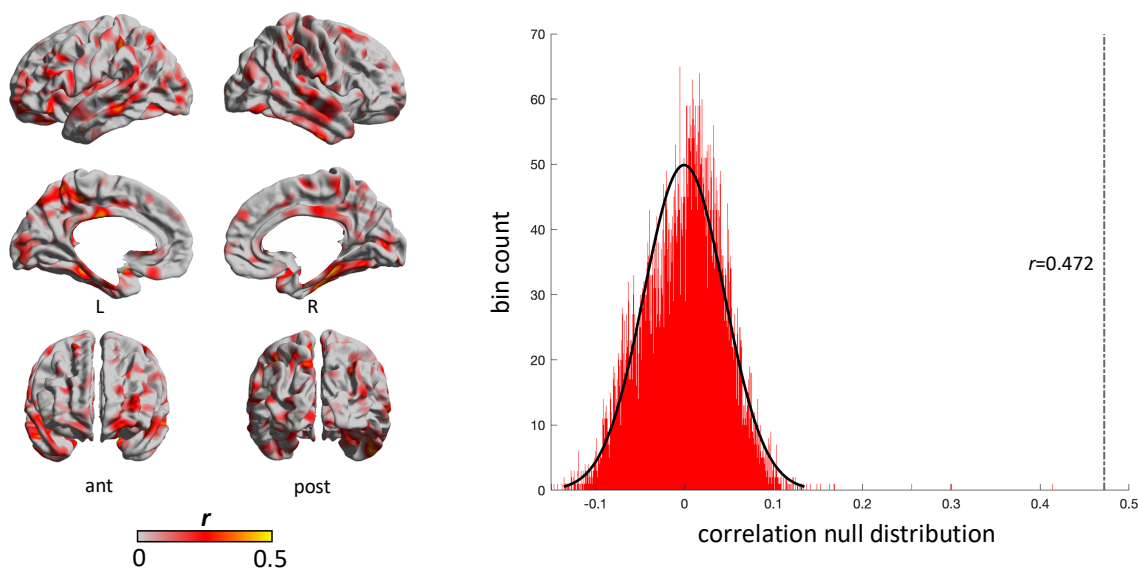

**Supplemental Figure 8** | **left panel:** Product-moment correlation coefficients of FMT performance on cortical thickness after regressing out age and sex. **right panel:** a non-parametric null distribution was generated by correlating the *CSST-D*  $\times$  cortical thickness statistical  $t$  map with 10,000 permuted  $t$  maps of *FMT*  $\times$  cortical thickness. Actual correlation between original maps is shown by the dashdotted line ( $r=0.472$ , non-parametric  $p<0.001$ ).

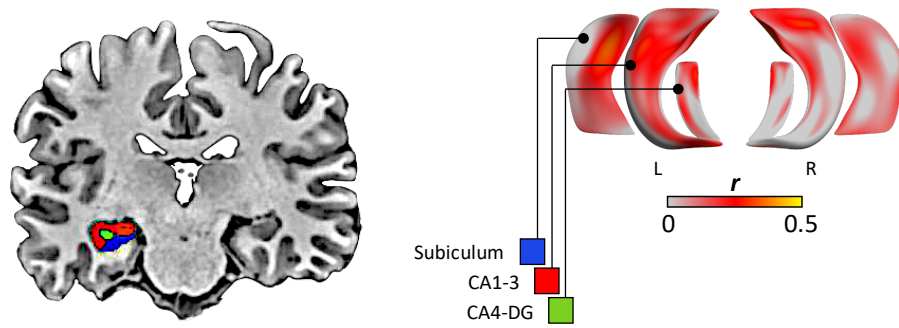

**Supplemental Figure 9** | **left panel:** coronal section of the brain showing the hippocampal subfields. **right panel:** uncorrected associations between CSST-D score and columnar volume shown on hippocampal subfield surfaces after regressing out age and sex.

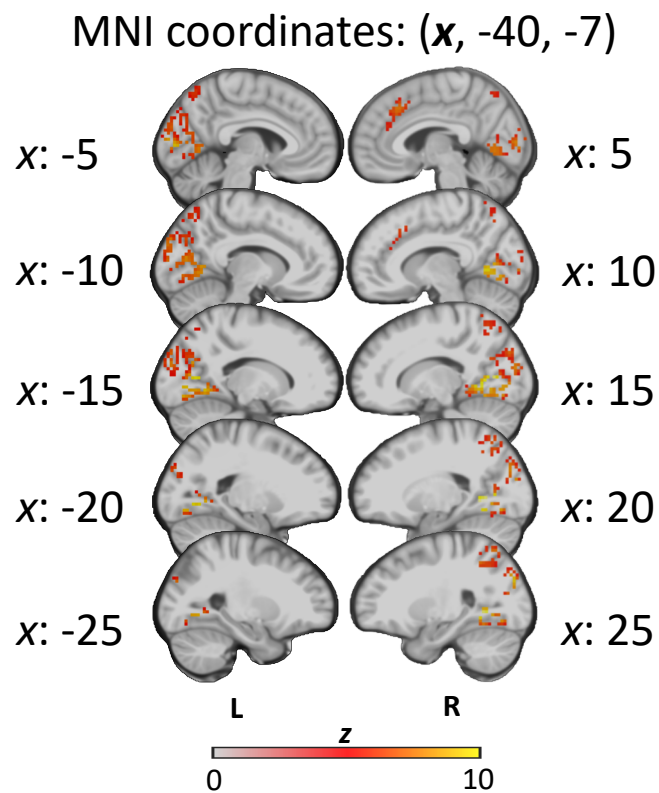

**Supplemental Figure 10** | Group-level volumetric activation map for the contrast between retrieval and encoding.

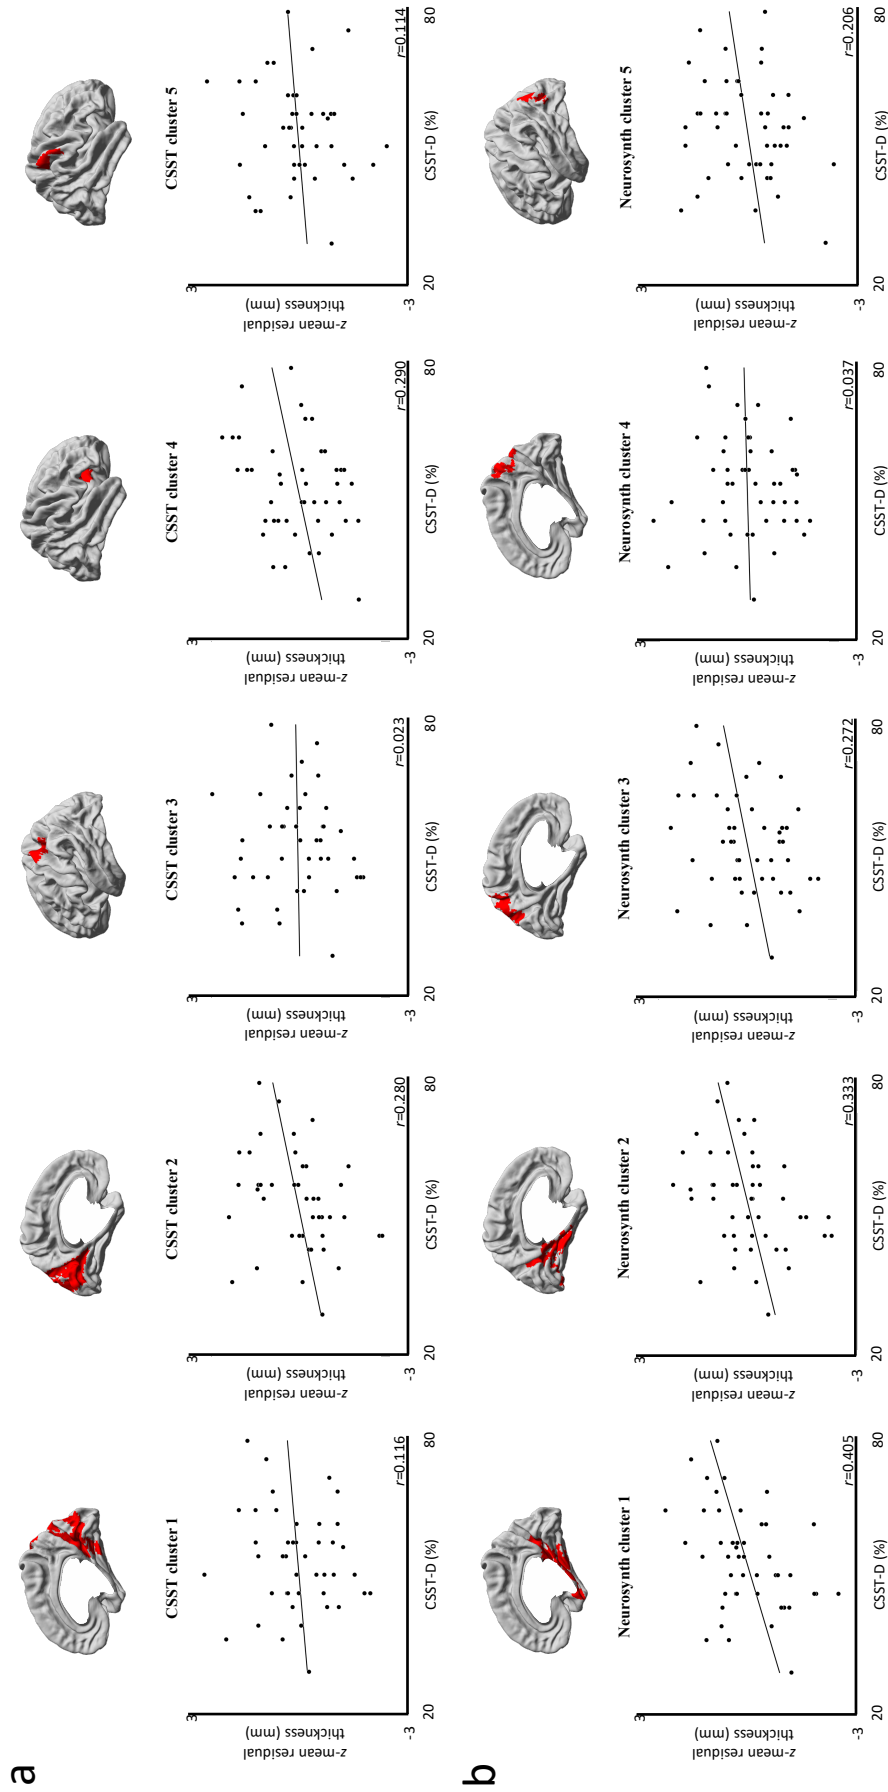

**Supplemental Figure 11 | Associations between cortical thickness and CSST-D performance for functionally-defined clusters after controlling for age and sex. a** Top 5 largest clusters for group level ( $n=44$ ) CSST activation for *retrieval-vs.-encoding* weighted contrast ( $r=0.023-0.290$ ). **b** Top 5 largest clusters for Neurosynth-derived coactivations for the term “navigation” ( $r=0.037-0.405$ ).

|       |        |       |        |       |
|-------|--------|-------|--------|-------|
| FMT   | 0.406  |       |        |       |
| Sem-D | 0.340  | 0.237 |        |       |
| MST   | 0.150  | 0.278 | 0.172  |       |
| Epi-D | 0.083  | 0.206 | -0.058 | 0.224 |
|       | CSST-D | FMT   | Sem-D  | MST   |

**Supplemental Table 1** | Product-moment correlation coefficients of task performance scores (see **Figure 1b**)

|        | successful     | unsuccessful  |
|--------|----------------|---------------|
| CSST-E | 23 ± 3 (15-28) | 5 ± 3 (0-13)  |
| CSST-D | 15 ± 3 (8-22)  | 13 ± 3 (6-20) |
| Total  | 38 ± 5 (28-50) | 18 ± 5 (6-28) |

**Supplemental Table 2** | Number of successful and unsuccessful trials in the each condition of the CSST reported as the mean ± SD (range) .

| MNI<br>x,y,z {mm} | peak<br>T | peak<br>p(unc) | peak<br>p(FWE-corr) |
|-------------------|-----------|----------------|---------------------|
| 18 -64 5          | 14.87     | <0.001         | <0.001              |
| 21 -58 -1         | 14.52     | <0.001         | <0.001              |
| 12 -58 2          | 11.74     | <0.001         | <0.001              |
| -15 -67 8         | 11.24     | <0.001         | <0.001              |
| -18 -76 -4        | 11.16     | <0.001         | <0.001              |
| -21 -64 -4        | 10.7      | <0.001         | <0.001              |
| 33 23 2           | 9.68      | <0.001         | <0.001              |
| 39 20 -13         | 7.13      | <0.001         | 0.001               |
| -39 -22 59        | 9.54      | <0.001         | <0.001              |
| -39 -37 41        | 7.99      | <0.001         | <0.001              |
| -33 -16 65        | 7.97      | <0.001         | <0.001              |
| 36 -49 50         | 9.17      | <0.001         | <0.001              |
| 27 -52 47         | 9.01      | <0.001         | <0.001              |
| 24 -67 59         | 8.2       | <0.001         | <0.001              |
| 6 26 41           | 8.46      | <0.001         | <0.001              |
| 6 38 23           | 6.37      | <0.001         | 0.008               |
| 45 -28 47         | 8.19      | <0.001         | <0.001              |
| 42 -37 47         | 7.91      | <0.001         | <0.001              |
| 51 -19 44         | 7.19      | <0.001         | 0.001               |
| 45 32 23          | 8.05      | <0.001         | <0.001              |
| -9 -70 53         | 7.14      | <0.001         | 0.001               |
| -12 -76 47        | 6.52      | <0.001         | 0.005               |

**Supplemental Table 3** | Group-level volumetric statistics for contrast between retrieval and encoding across pooled CSST-E and CSST-D trials.
